# Supplementary material for: Canine distemper in Nepal's Annapurna Conservation Area – Implications of dog husbandry and human behaviour for wildlife disease
Source: PubMed Central journal article supplement (PMC6894829; doi:10.1371/journal.pone.0220874), 2019-12-05

## S1 Appendix

Interviewer

Date (dd/mm)

Site<sup>1</sup> M, P, B, G, N, K

GPS location

Name of interviewee

(M/F)

Is interviewee the owner of the house (Y/N)

No. of people in the household?

No. of children (<18years)

### I.- QUESTIONS ABOUT OWNED DOG(S)

- 10
1. How many dogs do you have? \_\_\_\_\_  
If no dogs, skip to PART II.
  2. How many puppies (dogs < 3 mths) \_\_\_\_\_
  3. Dog(s) details:

| Name | Sex | Age <sup>2</sup> | Breed | Source <sup>3</sup> | Function <sup>4</sup> | Roaming <sup>5</sup> | kg | Sterilised |
|------|-----|------------------|-------|---------------------|-----------------------|----------------------|----|------------|
|      | M/F |                  |       | N/BO/F/BN           | G/He/P/H              | N/A/S                |    | Y/N        |
|      | M/F |                  |       | N/BO/F/BN           | G/He/P/H              | N/A/S                |    | Y/N        |
|      | M/F |                  |       | N/BO/F/BN           | G/He/P/H              | N/A/S                |    | Y/N        |
|      | M/F |                  |       | N/BO/F/BN           | G/He/P/H              | N/A/S                |    | Y/N        |

- 15
4. Do your neighbours' dog/s roam freely in the neighbourhood?\*
- a. Always
  - b. Sometimes (describe) \_\_\_\_\_
  - c. Never

- 20
5. Do you see free-roaming dogs of unknown/no owner in the neighbourhood?\*
- a. Always
  - b. Sometimes (describe) \_\_\_\_\_
  - c. Never

<sup>1</sup> m = Manang/Humre, p = Pisang, b = Bhraka, g = Ghyaru, n = Ngawal, k = Khangsar

<sup>2</sup> P = Pups (0–4 mo), j = Juveniles (5–12 mo), a = Adults (>12 mo)

<sup>3</sup> N: acquired from neighbours, BO: bought, F: found, BN: born at home

<sup>4</sup> G: guarding, He: herding, P: pet, H: hunting

<sup>5</sup> N: never, A: always, S: sometimes

25 6. How do you feed your dog(s) (Specify: kind of food and frequency)?

|              |               |
|--------------|---------------|
| Kind of food | No. times/day |
|              |               |

30 7. How do you dispose your waste?  
 a. Open Dump  
 b. Closed Dump  
 c. Burning  
 d. At a central dump (municipal)  
 e. Other (specify) \_\_\_\_\_

8. If your dog is a female fill in the table below (Fertility):

| 1. Name of female dog | 2. Total no. of litters | 3. Litter in last 12 mths? | 4. If yes, give months | Puppies from last 12 months |                  |                             |              |                    | 9.No. remaining? |
|-----------------------|-------------------------|----------------------------|------------------------|-----------------------------|------------------|-----------------------------|--------------|--------------------|------------------|
|                       |                         |                            |                        | 5. Litter size              | 6.No. given away | 7. Free-roaming (abandoned) | 8a. No. died | 8b. Cause of death |                  |
|                       |                         | Y/<br>N                    |                        |                             |                  |                             |              |                    |                  |

35 9. Do you de-worm your dogs? (Y/N) If 'Y', with what \_\_\_\_\_ how often?  
 \_\_\_\_\_

40 10. Have your dog(s) have been seen by a veterinary? (Y/N)  
 If 'Y', go to Q11. If 'N', go to Q12.

11. How often have you visited the veterinary with your dog(s) in the past 12 months? \_\_\_\_\_

45 12. Vaccination status of your dog(s)

| Name of dog | Vaccinated (Y/N) | Vaccine <sup>6</sup> | Date of vaccination (Month/Yr) |
|-------------|------------------|----------------------|--------------------------------|
|             |                  |                      |                                |
|             |                  |                      |                                |
|             |                  |                      |                                |
|             |                  |                      |                                |

13. How many dogs died in the last 12 months \_\_\_\_\_?

---

<sup>6</sup>Rabies (R), CDV, CPV

14. For dogs that died complete the table below:

| Name | Age | Sex | Date | Causes                        |         |         |                     |
|------|-----|-----|------|-------------------------------|---------|---------|---------------------|
|      |     |     |      | Killed by human<br>(describe) | Old age | Disease | Other<br>(describe) |
|      |     | M/F |      |                               |         |         |                     |
|      |     | M/F |      |                               |         |         |                     |
|      |     | M/F |      |                               |         |         |                     |
|      |     | M/F |      |                               |         |         |                     |

50

15. How many dogs got sick in the past 12 months \_\_\_\_\_?

16. Regarding sick animals. Which clinical signs did the dogs that died/get sick show?

| CLINICAL SIGN                                                                                      | NAME OF DOG |             |             |             |             |
|----------------------------------------------------------------------------------------------------|-------------|-------------|-------------|-------------|-------------|
| Coughing                                                                                           |             |             |             |             |             |
| Sneezing                                                                                           |             |             |             |             |             |
| Nasal Discharge                                                                                    |             |             |             |             |             |
| Blindness                                                                                          |             |             |             |             |             |
| Blue eyes                                                                                          |             |             |             |             |             |
| Lacrimation watery eyes                                                                            |             |             |             |             |             |
| Anorexia wants to eat but difficulty picking up, chewing, or swallowing food, decrease in appetite |             |             |             |             |             |
| Emaciation loss of fat, ribs showing                                                               |             |             |             |             |             |
| Salivation                                                                                         |             |             |             |             |             |
| Vomiting                                                                                           |             |             |             |             |             |
| Diarrhoea                                                                                          |             |             |             |             |             |
| Vocalization incessant barking/howling – if yes, what time of the day does vocalisation occur?     | Time of day | Time of day | Time of day | Time of day | Time of day |
| Change of behaviour                                                                                |             |             |             |             |             |
| Ataxia loss of coordination, walks funny                                                           |             |             |             |             |             |
| Convulsions sudden, <i>violent</i> , uncontrolled muscle movement                                  |             |             |             |             |             |
| Muscle twitching                                                                                   |             |             |             |             |             |
| Paralysis loss of muscle function, whole or partial                                                |             |             |             |             |             |
| Coma loss of consciousness                                                                         |             |             |             |             |             |
| Death                                                                                              |             |             |             |             |             |
| Others                                                                                             |             |             |             |             |             |

55

## II.- ATTITUDES REGARDING COMMUNITY DOGS

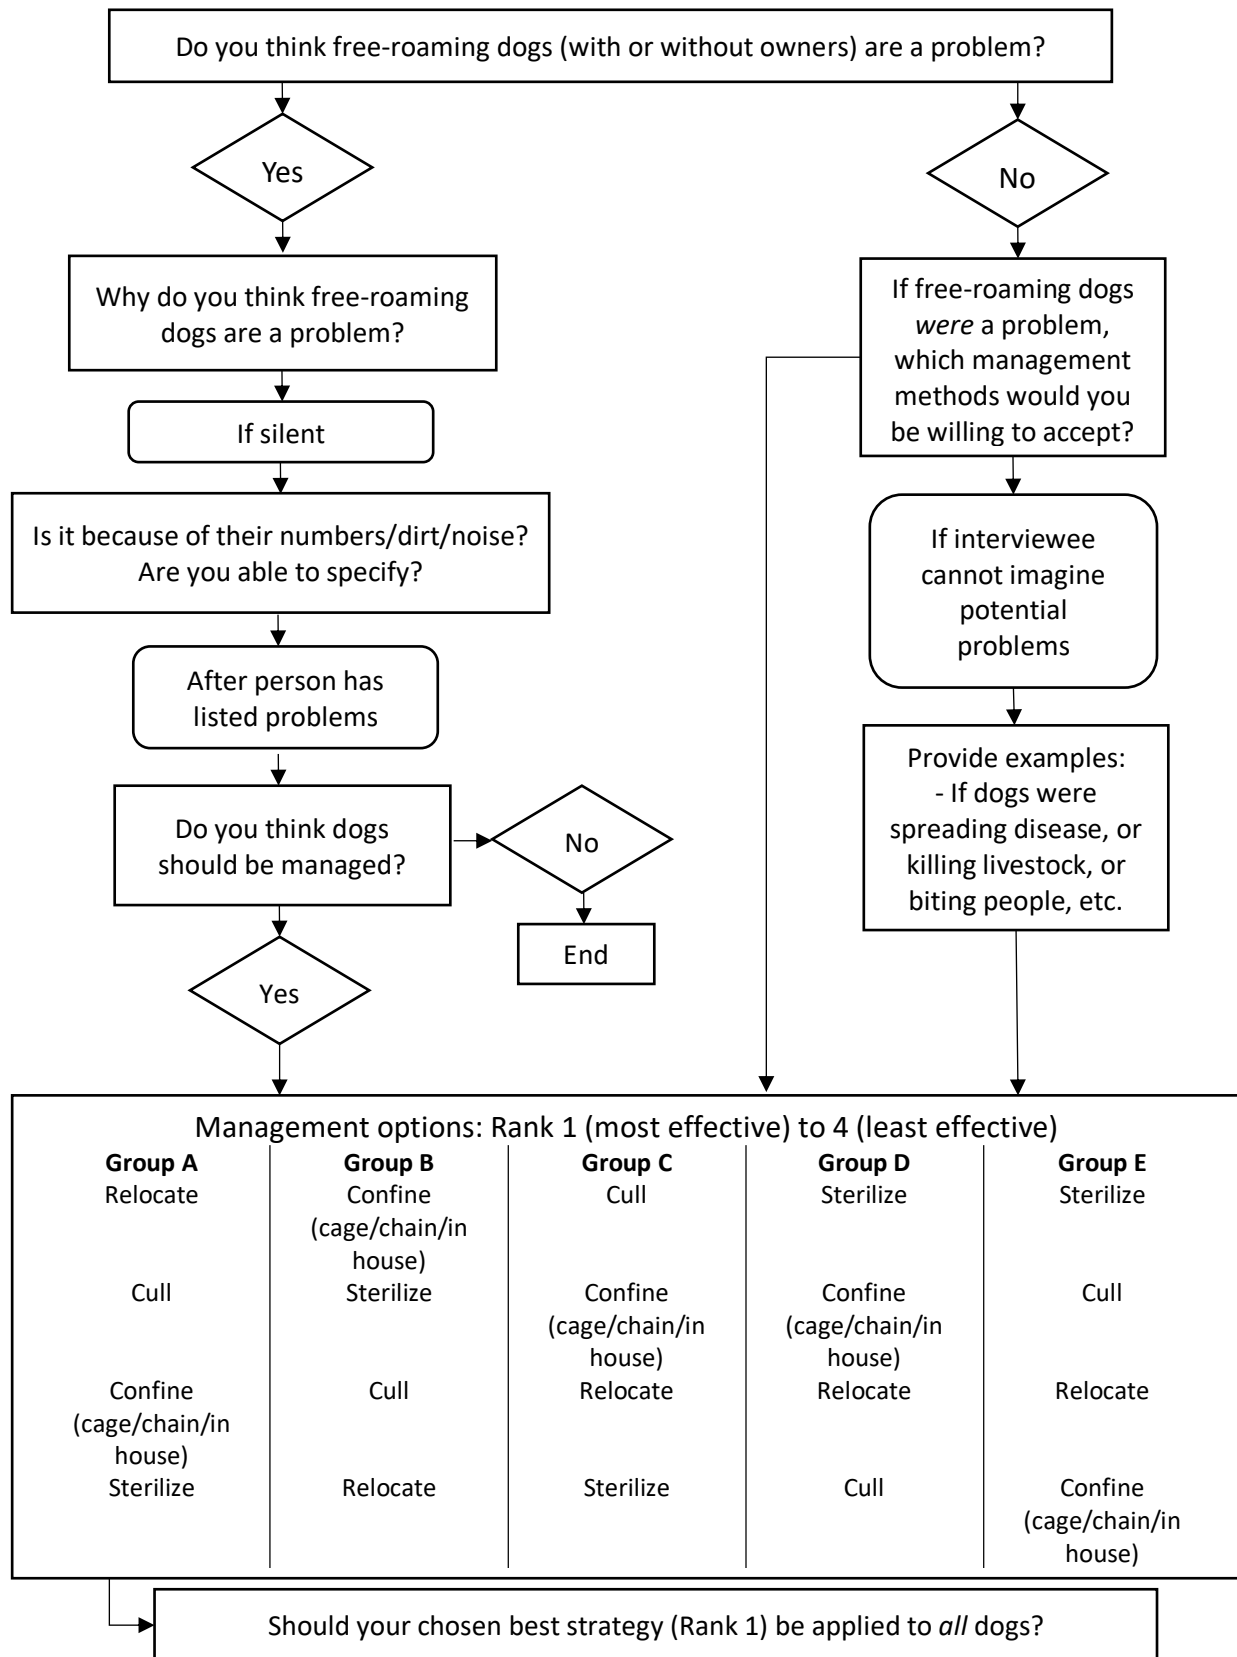

### III. QUESTIONS REGARDING LIVESTOCK AND WILDLIFE

60 17. Which of these wild animals exist in **this area**? (Showing pictures) 1 2 3 4 5 6

18. Have you seen any of these animals **close to your house or your animals**? Y/N.  
If 'Y', which animal/s? 1 2 3 4 5 6

65 19. Which of the animals identified in Q18 come close your house **more often**?  
1 2 3 4 5 6

20. What other animals (species and number) do you have in your home?

|     |      |       |     |       |      |       |     |
|-----|------|-------|-----|-------|------|-------|-----|
| Cat | Goat | Sheep | Cow | Horse | Mule | Jyupa | Yak |
|-----|------|-------|-----|-------|------|-------|-----|

70 21. Have your livestock been attacked by **wild** carnivores, Y/N  
If 'Y', follow to Q22. If 'N', go to Q23.

22. Please point out kind of livestock and number of animals killed by these attacks in the last year and the wild animal that likely caused them.

75

| Kind of livestock | No. killed | Wild predator |
|-------------------|------------|---------------|
|                   |            |               |
|                   |            |               |
|                   |            |               |

- Was the attack witnessed? (Y/N), If 'Y' go to Q23.
- If 'N', how was the species of predator determined?

80

23. Have you seen your dog(s) in contact with **wild animals**? Y/N  
If 'Y', go to Q24-25. If 'N', go to Q26.

24. With what animals have you seen your dog(s) in contact with?

85

25. What were you or your dog doing when the encounter happened? Season? Weather?

90

26. Of the animals in the pictures, have you seen any with **signs of diseases**? Y/N  
If 'Y', please describe:

| Animal (1-6) | Place | Date or year /Season | Symptoms (ref. Q16) | Other details |
|--------------|-------|----------------------|---------------------|---------------|
|              |       |                      |                     |               |
|              |       |                      |                     |               |

95

#### **IV. Questions regarding socioeconomic condition**

27. Household condition

- 100
- a. Own
  - b. Rented
  - c. Family house
  - d. Others (Specify)

28. Education of household owner

- 105
- a. No formal education
  - b. Primary (Grade 1-5)
  - c. Lower Secondary (Grade 6-8)
  - d. Secondary (Grade 9-10)
  - e. Higher Secondary (Grade 11-12)

END OF INTERVIEW

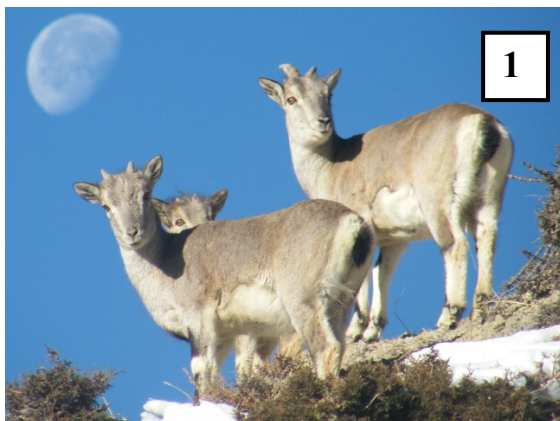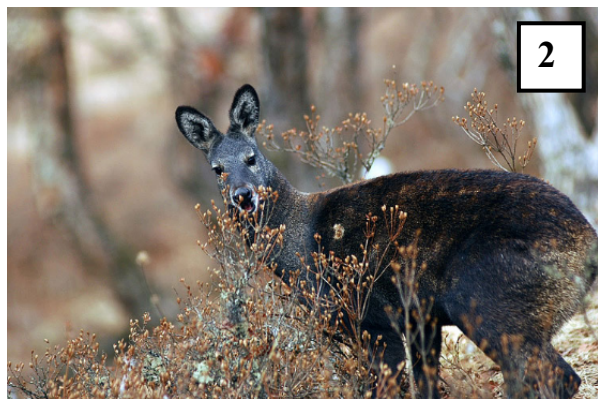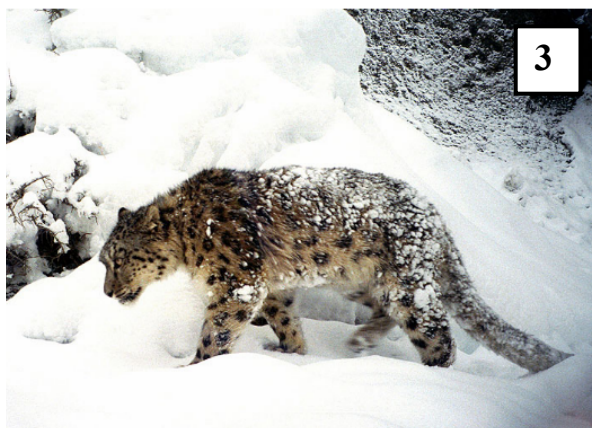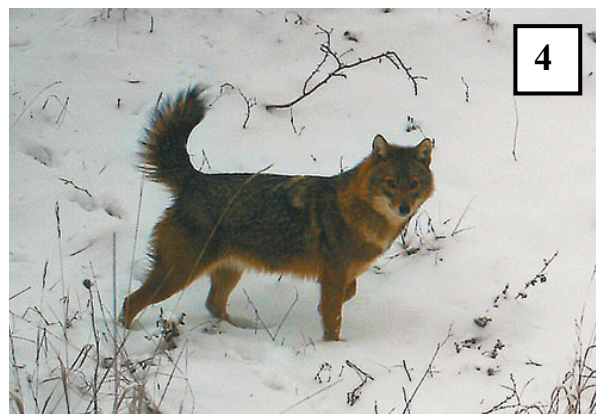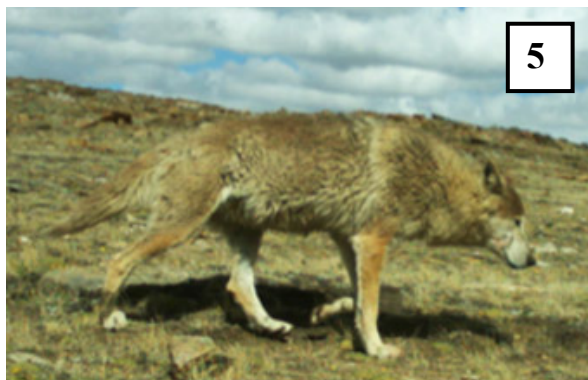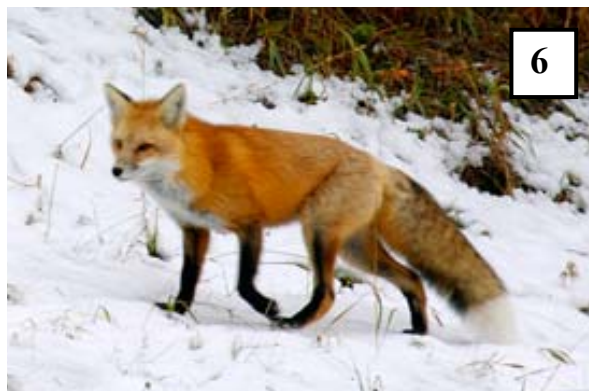

Supplement: pone.0220874.s004.pdf [file pone.0220874.s004.pdf]
