# Supplementary material for: Canine distemper in Nepal's Annapurna Conservation Area – Implications of dog husbandry and human behaviour for wildlife disease
Source: PubMed Central journal article supplement (PMC6894829; doi:10.1371/journal.pone.0220874), 2019-12-05
Supplement: pone.0220874.s002.pdf [file pone.0220874.s002.pdf]

## S2 Table

5

|           | Predator |     |     |        |              |      |         |
|-----------|----------|-----|-----|--------|--------------|------|---------|
|           |          | Dog | Fox | Jackal | Snow leopard | Wolf | Unknown |
| Livestock | Bull     |     |     |        |              |      | 1       |
|           | Chauri   |     |     |        | 28           | 1    |         |
|           | Chicken  | 1   | 2   |        |              |      | 4       |
|           | Cow      |     |     |        | 1            |      | 1       |
|           | Goat     | 3   |     | 2      | 3            |      | 1       |
|           | Horse    |     |     |        | 3            |      |         |
|           | Yak      |     |     |        | 23           |      |         |
