# Supplementary material for: Canine distemper in Nepal's Annapurna Conservation Area – Implications of dog husbandry and human behaviour for wildlife disease
Source: PubMed Central journal article supplement (PMC6894829; doi:10.1371/journal.pone.0220874), 2019-12-05
Supplement: pone.0220874.s003.pdf [file pone.0220874.s003.pdf]

### S3 Table

| SN | S/P ratio | Result   | SN | S/P ratio | Result   |
|----|-----------|----------|----|-----------|----------|
| 1  | 0.41      | Positive | 44 | 0.27048   | Positive |
| 2  | 0.67      | Positive | 45 | 0.47363   | Positive |
| 3  | 0.12      | Negative | 46 | 0.28844   | Positive |
| 4  | 0.34      | Positive | 47 | 0.27385   | Positive |
| 5  | 0.26      | Positive | 48 | 0.24916   | Positive |
| 6  | 0.22      | Negative | 49 | 0.3569    | Positive |
| 7  | 0.18      | Negative | 50 | 0.22783   | Negative |
| 8  | 0.36      | Positive | 51 | 0.79461   | Positive |
| 9  | 0.69      | Positive | 52 | 0.04938   | Negative |
| 10 | 0.15      | Negative | 53 | 0.27385   | Positive |
| 11 | 0.52      | Positive | 54 | 0.3569    | Positive |
| 12 | 0.16835   | Negative | 55 | 0.36588   | Positive |
| 13 | 0.27609   | Positive | 56 | 0.3367    | Positive |
| 14 | 0.36027   | Positive | 57 | 0.35578   | Positive |
| 15 | 0.58361   | Positive | 58 | 0.13356   | Negative |
| 16 | 0.55219   | Positive | 59 | 0.21886   | Negative |
| 17 | 0.37486   | Positive | 60 | 0.37823   | Positive |
| 18 | 0.37374   | Positive | 61 | 0.25028   | Positive |
| 19 | 0.29405   | Positive | 62 | 0.17396   | Negative |
| 20 | 0.35915   | Positive | 63 | 0.28956   | Positive |
| 21 | 0.17733   | Negative | 64 | 0.41639   | Positive |
| 22 | 0.15264   | Negative | 65 | 0.15488   | Negative |
| 23 | 0.55668   | Positive | 66 | 0.20651   | Negative |
| 24 | 0.3468    | Positive | 67 | 0.37935   | Positive |
| 25 | 0.14366   | Negative | 68 | 0.2413    | Negative |
| 26 | 0.31089   | Positive | 69 | 0.33221   | Positive |
| 27 | 0.15152   | Negative | 70 | 0.47699   | Positive |
| 28 | 0.46577   | Positive | 71 | 0.28058   | Positive |
| 29 | 0.15376   | Negative | 72 | 0.25926   | Positive |
| 30 | 0.39282   | Positive | 73 | 0.77104   | Positive |
| 31 | 0.48709   | Positive | 74 | 0.54097   | Positive |
| 32 | 0.50617   | Positive | 75 | 0.37149   | Positive |
| 33 | 0.16049   | Negative | 76 | 0.49944   | Positive |
| 34 | 0.36364   | Positive | 77 | 0.22559   | Negative |
| 35 | 0.65993   | Positive | 78 | 0.20314   | Negative |
| 36 | 0.40292   | Positive | 79 | 0.15937   | Negative |
| 37 | 0.31313   | Positive | 80 | 0.16835   | Negative |
| 38 | 0.2312    | Negative | 81 | 0.34343   | Positive |
| 39 | 0.40067   | Positive | 82 | 0.41077   | Positive |
| 40 | 0.33782   | Positive | 83 | 0.30303   | Positive |
| 41 | 0.23681   | Negative | 84 | 0.30752   | Positive |
| 42 | 0.45679   | Positive | 85 | 0.63749   | Positive |
| 43 | 0.38272   | Positive |    |           |          |
