# Supplementary material for: Canine distemper in Nepal's Annapurna Conservation Area – Implications of dog husbandry and human behaviour for wildlife disease
Source: PubMed Central journal article supplement (PMC6894829; doi:10.1371/journal.pone.0220874), 2019-12-05
Supplement: pone.0220874.s005.pdf [file pone.0220874.s005.pdf]

## S2 Appendix

180 Researcher: \_\_\_\_\_ Date: \_\_\_\_\_ ID: \_\_\_\_\_

Owners name: \_\_\_\_\_

Dogs name: \_\_\_\_\_

Location \_\_\_\_\_

Sex (M/F) \_\_\_\_\_

Sterilised (Y/N) \_\_\_\_\_

**Tube no.** \_\_\_\_\_

Vaccination: Rabies/CDV/CPV \_\_\_\_\_

**Photo no.** \_\_\_\_\_

Function: **G**uarding/**H**erding/**P**et/**H**unting \_\_\_\_\_

Dog's Age: Pup (3–5 mo), Juv (5–12 mo)  
Adults (>12 mo)

Breed: \_\_\_\_\_

Source<sup>7</sup>: N / Bt / F / Bn

Weight (kg) \_\_\_\_\_

Length (mm) \_\_\_\_\_

Roaming: Never / Always / Sometimes

Skin Condition: none / < 20% / > 20%

9-point BCS<sup>8</sup>: \_\_\_\_\_

/9

Body condition notes: \_\_\_\_\_

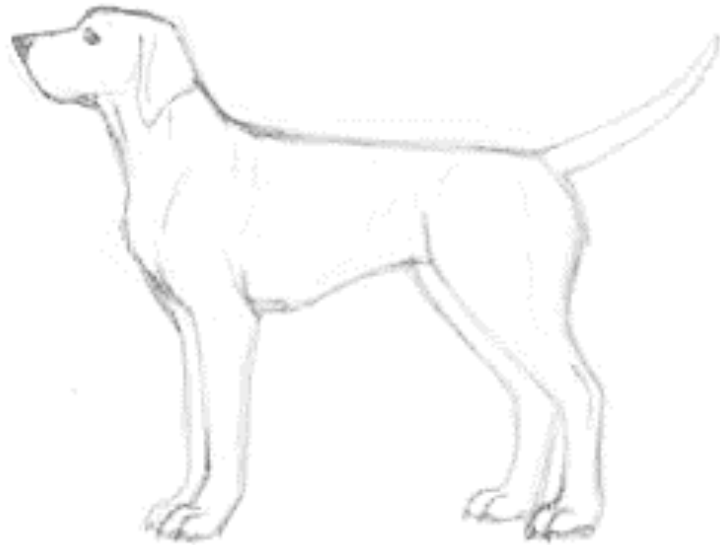

Comments: \_\_\_\_\_  
\_\_\_\_\_  
\_\_\_\_\_  
\_\_\_\_\_

<sup>7</sup> N: acquired from neighbours, Bt: bought, F: found, Bn: born at home

<sup>8</sup> 1 (very thin) 5 (Ideal) 9 (obese)
