# Supplementary material for: Canine distemper in Nepal's Annapurna Conservation Area – Implications of dog husbandry and human behaviour for wildlife disease
Source: PubMed Central journal article supplement (PMC6894829; doi:10.1371/journal.pone.0220874), 2019-12-05
Supplement: pone.0220874.s010.pdf [file pone.0220874.s010.pdf]

# S1 File

## Term codes for predicting CDV seroprevalence

| Body condition (bcs) | Dog age (dogage) | Dog sex (dogsex) | Function (func) | Household income (income) | People per household (nhouse) | Roaming (roam) | Site (site) | Sterilised status (ster) |
|----------------------|------------------|------------------|-----------------|---------------------------|-------------------------------|----------------|-------------|--------------------------|
| 1                    | 2                | 3                | 4               | 5                         | 6                             | 7              | 8           | 9                        |

## Component models

| Model terms | df | logLik | AICc  | delta | weight |
|-------------|----|--------|-------|-------|--------|
| 2+8         | 6  | -24.35 | 62.34 | 0     | 0.29   |
| 8           | 4  | -27.52 | 63.79 | 1.45  | 0.14   |
| 5+8         | 5  | -26.41 | 63.97 | 1.63  | 0.13   |
| 4+8         | 6  | -25.21 | 64.07 | 1.73  | 0.12   |
| 8+9         | 5  | -26.53 | 64.22 | 1.87  | 0.11   |
| 1+8         | 5  | -27.15 | 65.45 | 3.11  | 0.06   |
| 3+8         | 5  | -27.5  | 66.15 | 3.81  | 0.04   |
| 6+8         | 5  | -27.5  | 66.16 | 3.81  | 0.04   |
| 7+8         | 6  | -27.45 | 68.55 | 6.21  | 0.01   |
| 2           | 3  | -31.82 | 70.09 | 7.75  | 0.01   |
| 9           | 2  | -33.33 | 70.88 | 8.53  | 0      |
| 2+6         | 4  | -31.11 | 70.98 | 8.64  | 0      |
| 1+9         | 3  | -32.34 | 71.12 | 8.77  | 0      |
| 2+3         | 4  | -31.18 | 71.12 | 8.78  | 0      |
| 2+4         | 5  | -30.03 | 71.21 | 8.87  | 0      |
| 2+5         | 4  | -31.28 | 71.31 | 8.96  | 0      |
| 5+9         | 3  | -32.44 | 71.33 | 8.98  | 0      |
| 3+9         | 3  | -32.44 | 71.33 | 8.98  | 0      |
| 1+2         | 4  | -31.37 | 71.49 | 9.15  | 0      |
| 6+9         | 3  | -32.81 | 72.06 | 9.71  | 0      |
| 2+9         | 4  | -31.66 | 72.07 | 9.72  | 0      |
| 3           | 2  | -34.3  | 72.83 | 10.48 | 0      |
| 5           | 2  | -34.34 | 72.9  | 10.56 | 0      |
| 4+9         | 4  | -32.16 | 73.08 | 10.73 | 0      |
| 6           | 2  | -34.43 | 73.08 | 10.74 | 0      |
| 2+7         | 5  | -31.13 | 73.41 | 11.06 | 0      |
| 3+5         | 3  | -33.59 | 73.63 | 11.29 | 0      |
| 1           | 2  | -34.85 | 73.92 | 11.58 | 0      |
| 5+6         | 3  | -33.79 | 74.03 | 11.69 | 0      |
| 3+6         | 3  | -33.92 | 74.28 | 11.94 | 0      |
| 1+3         | 3  | -33.99 | 74.42 | 12.07 | 0      |
| 4           | 3  | -34.01 | 74.46 | 12.12 | 0      |
| 4+5         | 4  | -32.91 | 74.57 | 12.23 | 0      |
| 1+6         | 3  | -34.15 | 74.74 | 12.4  | 0      |
| 4+6         | 4  | -33.02 | 74.79 | 12.45 | 0      |

|     |   |        |       |       |   |
|-----|---|--------|-------|-------|---|
| 1+5 | 3 | -34.22 | 74.88 | 12.54 | 0 |
| 7+9 | 4 | -33.16 | 75.07 | 12.73 | 0 |
| 3+4 | 4 | -33.21 | 75.18 | 12.84 | 0 |
| 7   | 3 | -34.75 | 75.95 | 13.61 | 0 |
| 1+4 | 4 | -33.85 | 76.46 | 14.12 | 0 |
| 5+7 | 4 | -33.87 | 76.49 | 14.14 | 0 |
| 3+7 | 4 | -34.04 | 76.84 | 14.5  | 0 |
| 1+7 | 4 | -34.15 | 77.06 | 14.71 | 0 |
| 6+7 | 4 | -34.17 | 77.09 | 14.74 | 0 |
| 4+7 | 5 | -33.52 | 78.19 | 15.85 | 0 |

Model averaged coefficients:  
(full average)

|             | Estimate  | Std. Error | Adjusted SE | z value | Pr(> z ) |
|-------------|-----------|------------|-------------|---------|----------|
| (Intercept) | 6.46E+00  | 2.68E+03   | 2.74E+03    | 0.00    | 0.998    |
| dogage2     | -5.00E+00 | 2.68E+03   | 2.74E+03    | 0.002   | 0.999    |
| dogage3     | -5.68E+00 | 2.68E+03   | 2.74E+03    | 0.002   | 0.998    |
| siteM       | 1.71E+01  | 1.94E+03   | 1.99E+03    | 0.009   | 0.993    |
| siteN       | -4.03E-01 | 1.13E+00   | 1.15E+00    | 0.35    | 0.726    |
| siteP       | -5.97E-01 | 9.64E-01   | 9.86E-01    | 0.605   | 0.545    |
| income      | 3.34E-05  | 1.14E-04   | 1.15E-04    | 0.291   | 0.771    |
| funche      | -2.74E-01 | 8.75E-01   | 8.82E-01    | 0.31    | 0.756    |
| funcp       | -1.74E-01 | 5.36E-01   | 5.40E-01    | 0.323   | 0.747    |
| ster1       | -1.34E-01 | 4.32E-01   | 4.35E-01    | 0.308   | 0.758    |
| bcs         | 3.47E-02  | 1.99E-01   | 2.01E-01    | 0.172   | 0.863    |
| dogsex1     | 1.51E-02  | 1.81E-01   | 1.85E-01    | 0.082   | 0.935    |
| nhouse      | 1.97E-04  | 4.72E-02   | 4.82E-02    | 0.004   | 0.997    |
| roam2       | -3.90E-03 | 1.51E-01   | 1.55E-01    | 0.025   | 0.98     |
| roam3       | -6.99E-03 | 1.55E-01   | 1.58E-01    | 0.044   | 0.965    |

(conditional average)

|             | Estimate  | Std. Error | Adjusted SE | z value | Pr(> z ) |
|-------------|-----------|------------|-------------|---------|----------|
| (Intercept) | 6.46E+00  | 2.68E+03   | 2.74E+03    | 0.002   | 0.9981   |
| dogage2     | -1.60E+01 | 4.79E+03   | 4.90E+03    | 0.003   | 0.9974   |
| dogage3     | -1.82E+01 | 4.79E+03   | 4.90E+03    | 0.004   | 0.997    |
| siteM       | 1.82E+01  | 2.00E+03   | 2.05E+03    | 0.009   | 0.9929   |
| siteN       | -4.27E-01 | 1.16E+00   | 1.18E+00    | 0.362   | 0.7174   |
| siteP       | -6.33E-01 | 9.81E-01   | 1.00E+00    | 0.63    | 0.5284   |
| income      | 2.42E-04  | 2.08E-04   | 2.13E-04    | 1.14    | 0.2543   |
| funche      | -2.14E+00 | 1.41E+00   | 1.45E+00    | 1.482   | 0.1384   |
| funcp       | -1.36E+00 | 7.94E-01   | 8.12E-01    | 1.678   | 0.0934   |
| ster1       | -1.01E+00 | 7.21E-01   | 7.37E-01    | 1.373   | 0.1697   |
| bcs         | 4.95E-01  | 5.79E-01   | 5.92E-01    | 0.837   | 0.4027   |
| dogsex1     | 2.79E-01  | 7.32E-01   | 7.47E-01    | 0.374   | 0.7082   |
| nhouse      | 3.74E-03  | 2.06E-01   | 2.10E-01    | 0.018   | 0.9858   |
| roam2       | -2.49E-01 | 1.18E+00   | 1.21E+00    | 0.206   | 0.8371   |

|       |           |          |          |       |        |
|-------|-----------|----------|----------|-------|--------|
| roam3 | -4.45E-01 | 1.15E+00 | 1.18E+00 | 0.378 | 0.7056 |
|-------|-----------|----------|----------|-------|--------|

Relative variable importance:

|                      | site | dogage | income | ster | func | bcs  | dogsex | nhouse | roam |
|----------------------|------|--------|--------|------|------|------|--------|--------|------|
| Importance:          | 0.94 | 0.31   | 0.14   | 0.13 | 0.13 | 0.07 | 0.05   | 0.05   | 0.02 |
| N containing models: | 9    | 9      | 9      | 9    | 9    | 9    | 9      | 9      | 9    |

#### Term codes for predicting dog abundance per household

| Elevation (elv) | Function (func) | Household Income (income) | People per household (nhouse) | Site (site) |
|-----------------|-----------------|---------------------------|-------------------------------|-------------|
| 1               | 2               | 3                         | 4                             | 5           |

Component models:

| Model terms: | df | logLik | AICc   | delta | weight |
|--------------|----|--------|--------|-------|--------|
| 3            | 2  | -68.99 | 142.21 | 0     | 0.21   |
| (Null)       | 1  | -70.18 | 142.42 | 0.22  | 0.18   |
| 3+4          | 3  | -68.8  | 144.04 | 1.83  | 0.08   |
| 4            | 2  | -70.03 | 144.27 | 2.06  | 0.07   |
| 1+3          | 3  | -68.99 | 144.43 | 2.22  | 0.07   |
| 1            | 2  | -70.15 | 144.53 | 2.32  | 0.06   |
| 2            | 3  | -69.06 | 144.56 | 2.35  | 0.06   |
| 2+3          | 4  | -68.39 | 145.54 | 3.33  | 0.04   |
| 1+3+4        | 4  | -68.8  | 146.35 | 4.14  | 0.03   |
| 1+4          | 3  | -70.02 | 146.48 | 4.27  | 0.02   |
| 2+4          | 4  | -68.89 | 146.53 | 4.32  | 0.02   |
| 1+2          | 4  | -69.01 | 146.78 | 4.58  | 0.02   |
| 1+5          | 5  | -68.01 | 147.18 | 4.97  | 0.02   |
| 5            | 4  | -69.22 | 147.19 | 4.98  | 0.02   |
| 2+3+4        | 5  | -68.2  | 147.56 | 5.35  | 0.01   |
| 3+5          | 5  | -68.32 | 147.8  | 5.59  | 0.01   |
| 1+2+3        | 5  | -68.38 | 147.92 | 5.71  | 0.01   |
| 1+3+5        | 6  | -67.32 | 148.29 | 6.08  | 0.01   |
| 1+2+4        | 5  | -68.86 | 148.88 | 6.67  | 0.01   |
| 2+5          | 6  | -67.91 | 149.47 | 7.26  | 0.01   |
| 1+4+5        | 6  | -67.95 | 149.54 | 7.33  | 0.01   |
| 4+5          | 5  | -69.2  | 149.56 | 7.36  | 0.01   |
| 1+2+5        | 7  | -66.89 | 150.01 | 7.8   | 0      |
| 1+2+3+4      | 6  | -68.2  | 150.04 | 7.84  | 0      |
| 3+4+5        | 6  | -68.27 | 150.2  | 7.99  | 0      |
| 1+3+4+5      | 7  | -67.3  | 150.85 | 8.64  | 0      |
| 2+3+5        | 7  | -67.58 | 151.4  | 9.2   | 0      |
| 2+4+5        | 7  | -67.86 | 151.97 | 9.76  | 0      |
| 1+2+3+5      | 8  | -66.67 | 152.29 | 10.08 | 0      |
| 1+2+4+5      | 8  | -66.87 | 152.68 | 10.47 | 0      |
| 2+3+4+5      | 8  | -67.51 | 153.96 | 11.75 | 0      |
| 1+2+3+4+5    | 9  | -66.67 | 155.09 | 12.88 | 0      |

Model-averaged coefficients:

(full average)

|             | Estimate  | Std. Error | Adjusted SE | z value | Pr(> z ) |
|-------------|-----------|------------|-------------|---------|----------|
| (Intercept) | -1.04E-01 | 2.83E+00   | 2.86E+00    | 0.036   | 0.971    |
| income      | 3.15E-05  | 4.38E-05   | 4.42E-05    | 0.712   | 0.477    |
| nhouse      | -8.49E-03 | 3.39E-02   | 3.45E-02    | 0.246   | 0.806    |
| elv         | 9.95E-05  | 8.05E-04   | 8.13E-04    | 0.122   | 0.903    |
| funche      | 6.33E-02  | 2.28E-01   | 2.31E-01    | 0.274   | 0.784    |
| funcp       | -4.13E-02 | 1.42E-01   | 1.44E-01    | 0.286   | 0.775    |
| siteM       | -4.94E-03 | 1.53E-01   | 1.56E-01    | 0.032   | 0.975    |
| siteN       | 5.65E-04  | 1.91E-01   | 1.95E-01    | 0.003   | 0.998    |
| siteP       | 5.41E-02  | 2.31E-01   | 2.33E-01    | 0.232   | 0.816    |

(conditional average)

|             | Estimate  | Std. Error | Adjusted SE | z value | Pr(> z ) |
|-------------|-----------|------------|-------------|---------|----------|
| (Intercept) | -1.04E-01 | 2.83E+00   | 2.86E+00    | 0.036   | 0.971    |
| income      | 6.52E-05  | 4.21E-05   | 4.30E-05    | 1.515   | 0.13     |
| nhouse      | -3.09E-02 | 5.91E-02   | 6.04E-02    | 0.512   | 0.609    |
| elv         | 3.72E-04  | 1.52E-03   | 1.54E-03    | 0.242   | 0.809    |
| funche      | 3.16E-01  | 4.23E-01   | 4.32E-01    | 0.732   | 0.464    |
| funcp       | -2.06E-01 | 2.58E-01   | 2.64E-01    | 0.78    | 0.436    |
| siteM       | -5.50E-02 | 5.06E-01   | 5.17E-01    | 0.106   | 0.915    |
| siteN       | 6.29E-03  | 6.39E-01   | 6.50E-01    | 0.01    | 0.992    |
| siteP       | 6.02E-01  | 5.14E-01   | 5.23E-01    | 1.151   | 0.25     |

Relative variable importance:

| income | nhouse | elv  | func | site |
|--------|--------|------|------|------|
| 0.48   | 0.27   | 0.27 | 0.2  | 0.09 |
| 16     | 16     | 16   | 16   | 16   |
